# Supplementary material for: Superhydrophobic/superoleophilic magnetic polyurethane sponge for oil/water separation
Source: Royal Society of Chemistry journal article supplement (doi:10.1039/c5ra12301a), 2015-01-01
Supplement: c5ra12301a1.pdf [file c5ra12301a1.pdf]

## Superhydrophobic/superoleophilic magnetic polyurethane sponge for oil/water separation

Shanhu Liu<sup>\*</sup>, Qingfeng Xu, Sanjay S. Latthe, Annaso B. Gurav, Ruimin Xing<sup>\*</sup>

Institute of Environmental and Analytical Sciences, College of Chemistry and  
Chemical Engineering, Henan University, Kaifeng 475001, P. R. China.

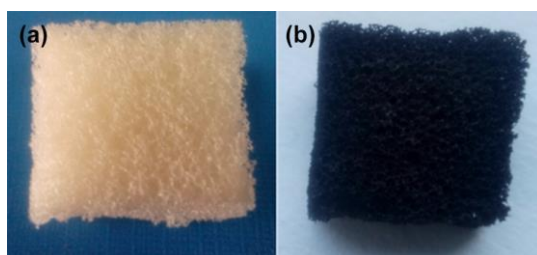

**Fig. S1** Optical images of pristine PU sponge (a) and magnetic PU sponge (b).

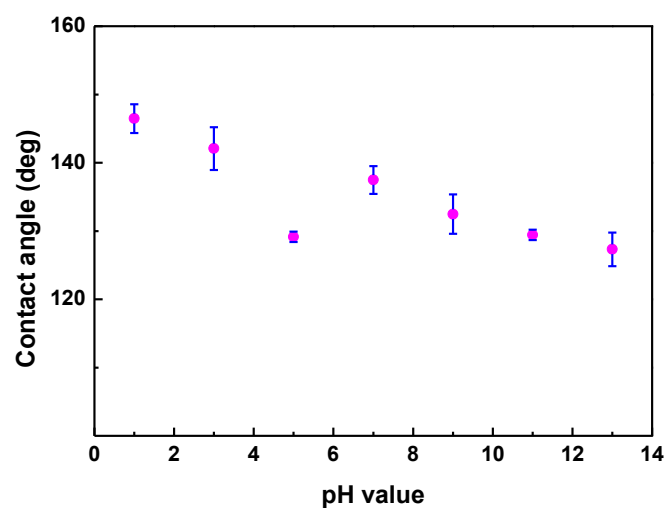

**Fig. S2** The wetting properties of the magnetic PU sponge in different pH corrosive solutions for 24h.

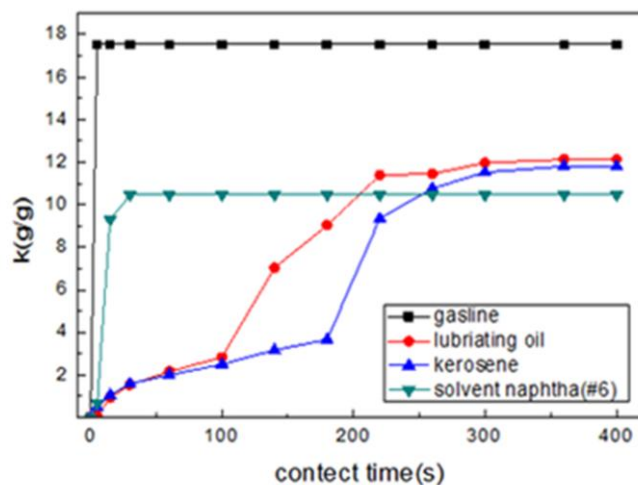

**Fig. S3** Absorption kinetics of the magnetic PU sponge in various oil and organic media.

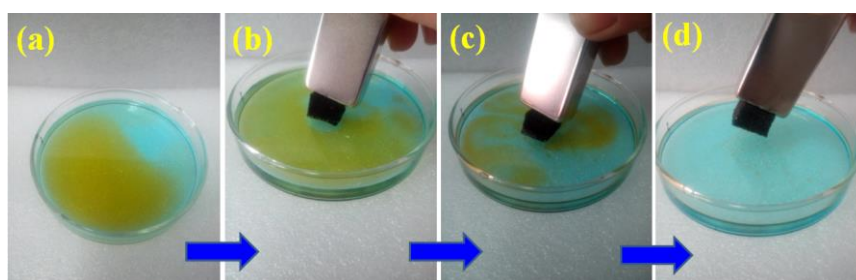

**Fig. S4** Optical images of magnetic PU sponge selectively and rapidly collecting lubricating oil from the oil/water mixture by a magnet bar.

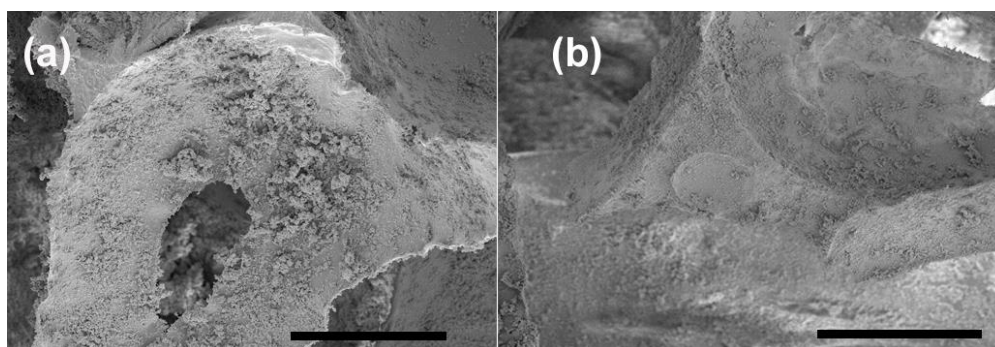

**Fig. S5** SEM image of the magnetic sponge without dopamine treatment (a) and after four times of separation cycle (b). All of the scale bars are 100  $\mu\text{m}$ .

**Table. S1** The effect of magnetic loading amount on the water contact angle.

| (%) | 3         | 7          | 15         | 23         | 32         | 50         |
|-----|-----------|------------|------------|------------|------------|------------|
| CA  | 153.7±2.7 | 154.0±2.0° | 150.0±2.9° | 151.0±0.7° | 152.3±3.9° | 148.3±2.1° |

**Movie S1** The magnetic PU sponge being moved under magnetic actuation.
